# Supplementary material for: Astrocyte-Derived Exosomes Differentially Shape T Cells’ Immune Response in MS Patients
Source: MDPI journal article supplement (doi:10.3390/ijms24087470), 2023-04-18
Supplement: s1 [file s1]

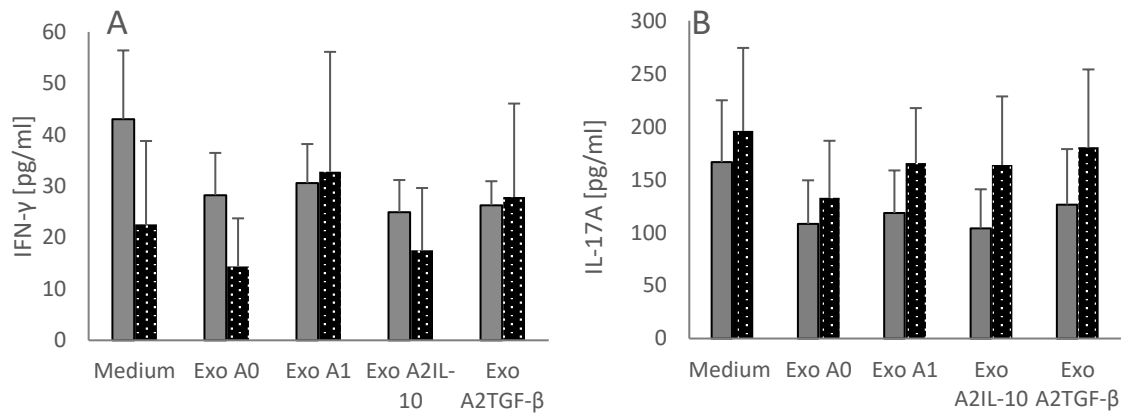

**Supplement Figure S1.** Comparison of IFN- $\gamma$  (A) and IL-17A (B) production in CD4 $^{+}$  T-cell cultures from multiple sclerosis-affected patients (filled bars) and healthy donors with excluded autoimmune disease (white dotted bars). After separation from PBMC, CD4 $^{+}$  T-cells from every donor were isolated by magnetic sorting, and cultured on 48-well culture plates ( $10^6$  cells/well) with exosomes isolated from non-stimulated (Exo A0), pro-inflammatory cytokines' stimulated (Exo A1) and anti-inflammatory cytokines' (IL-10, TGF- $\beta$ ) stimulated (respectively Exo A2IL-10, Exo A2TGF- $\beta$ ) human astrocytes. Data shown as mean  $\pm$  SEM. Comparisons of groups were made with U Mann-Whitney rank-sum test.

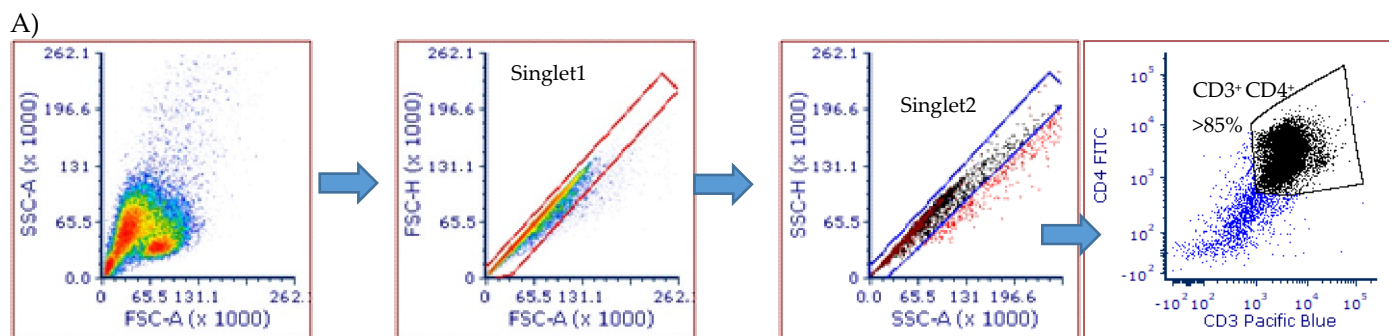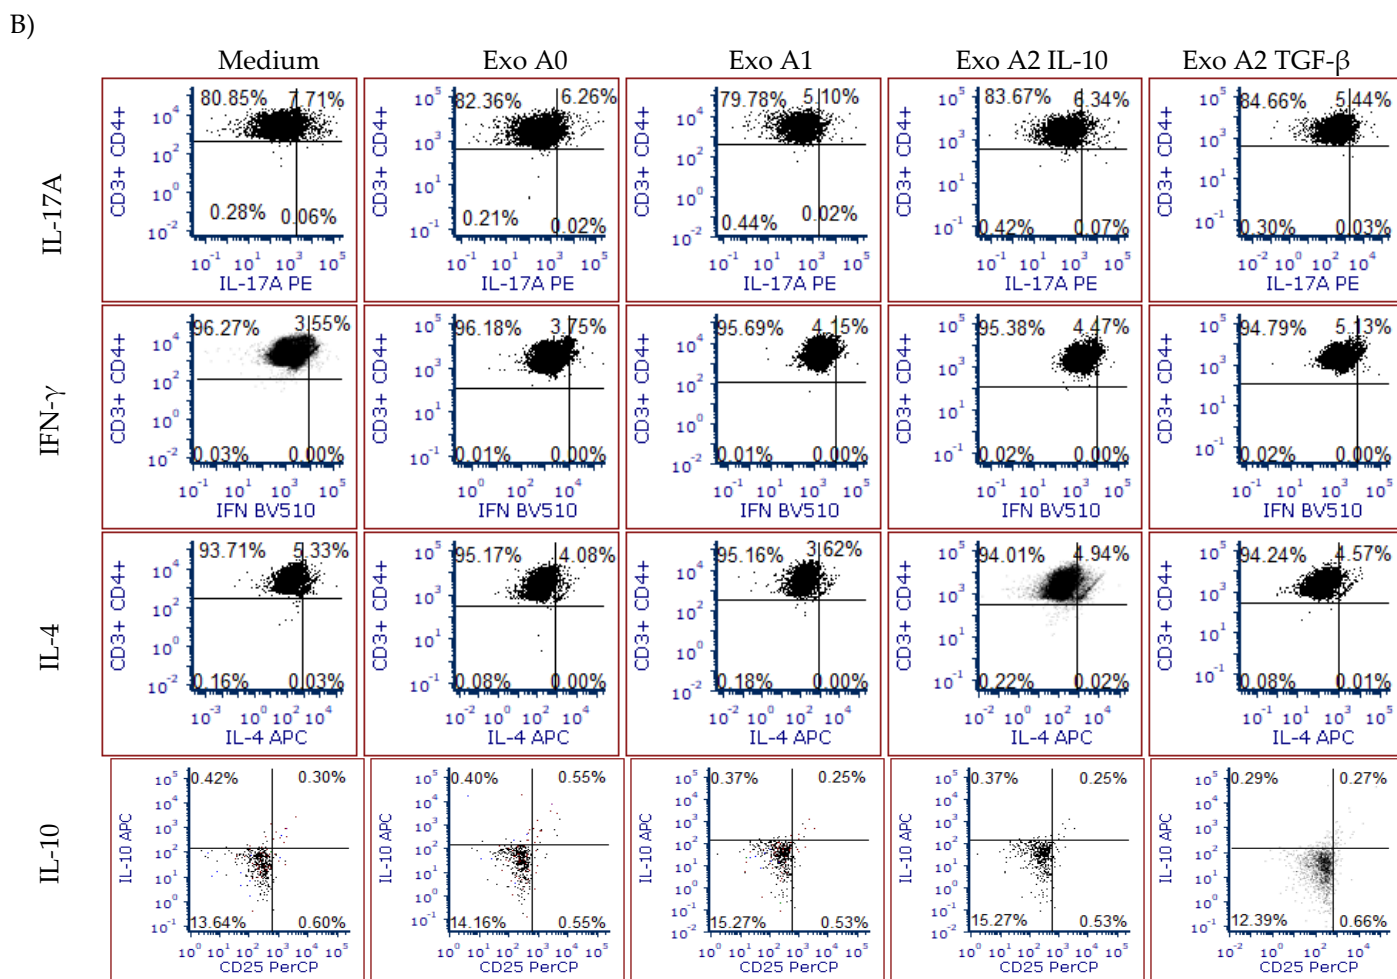

C)

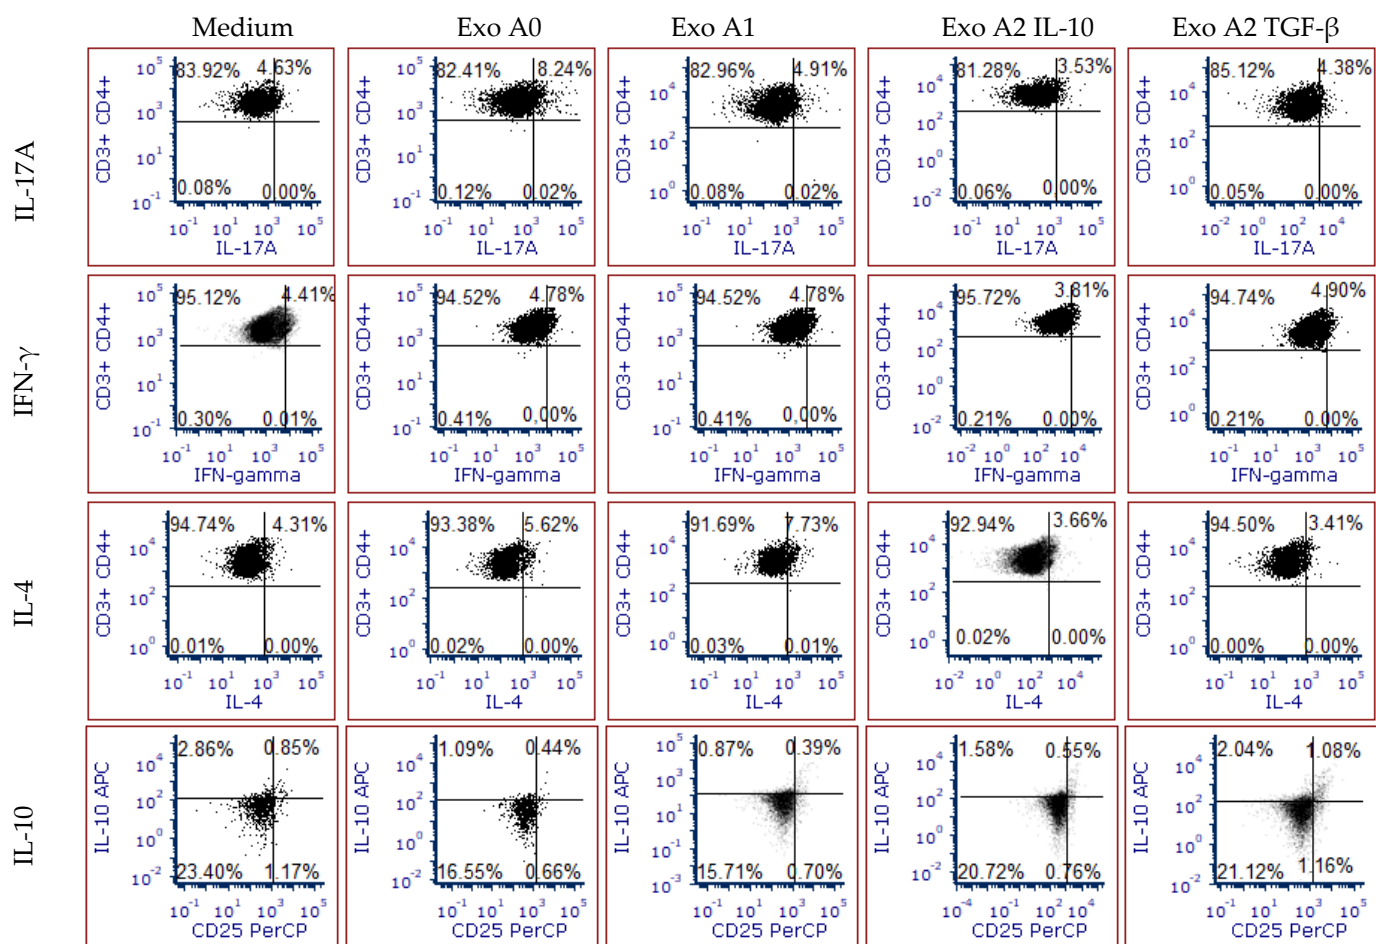

**Supplement Figure S2.** Representative dot plots from flow cytometry analyses of CD4<sup>+</sup> T-cells. A) Gating strategy and elimination of cell aggregates. Percentage values of IL-17A, IFN- $\gamma$ , IL-4 and IL-10 -producing T-cells from MS-affected patients (B), and non-MS donors (C), expressed as % of CD3, CD4 -positive T lymphocytes. T cells were separated from PBMC fraction after density gradient centrifugation (FicollPaquePlus), with magnetic sorting (MACS, Miltenyi Biotec) and cultured for 96h in culture medium (RPMI1640/10% FBS/penicillin, streptomycin) alone or with addition of astrocyte-derived extracellular vesicles.

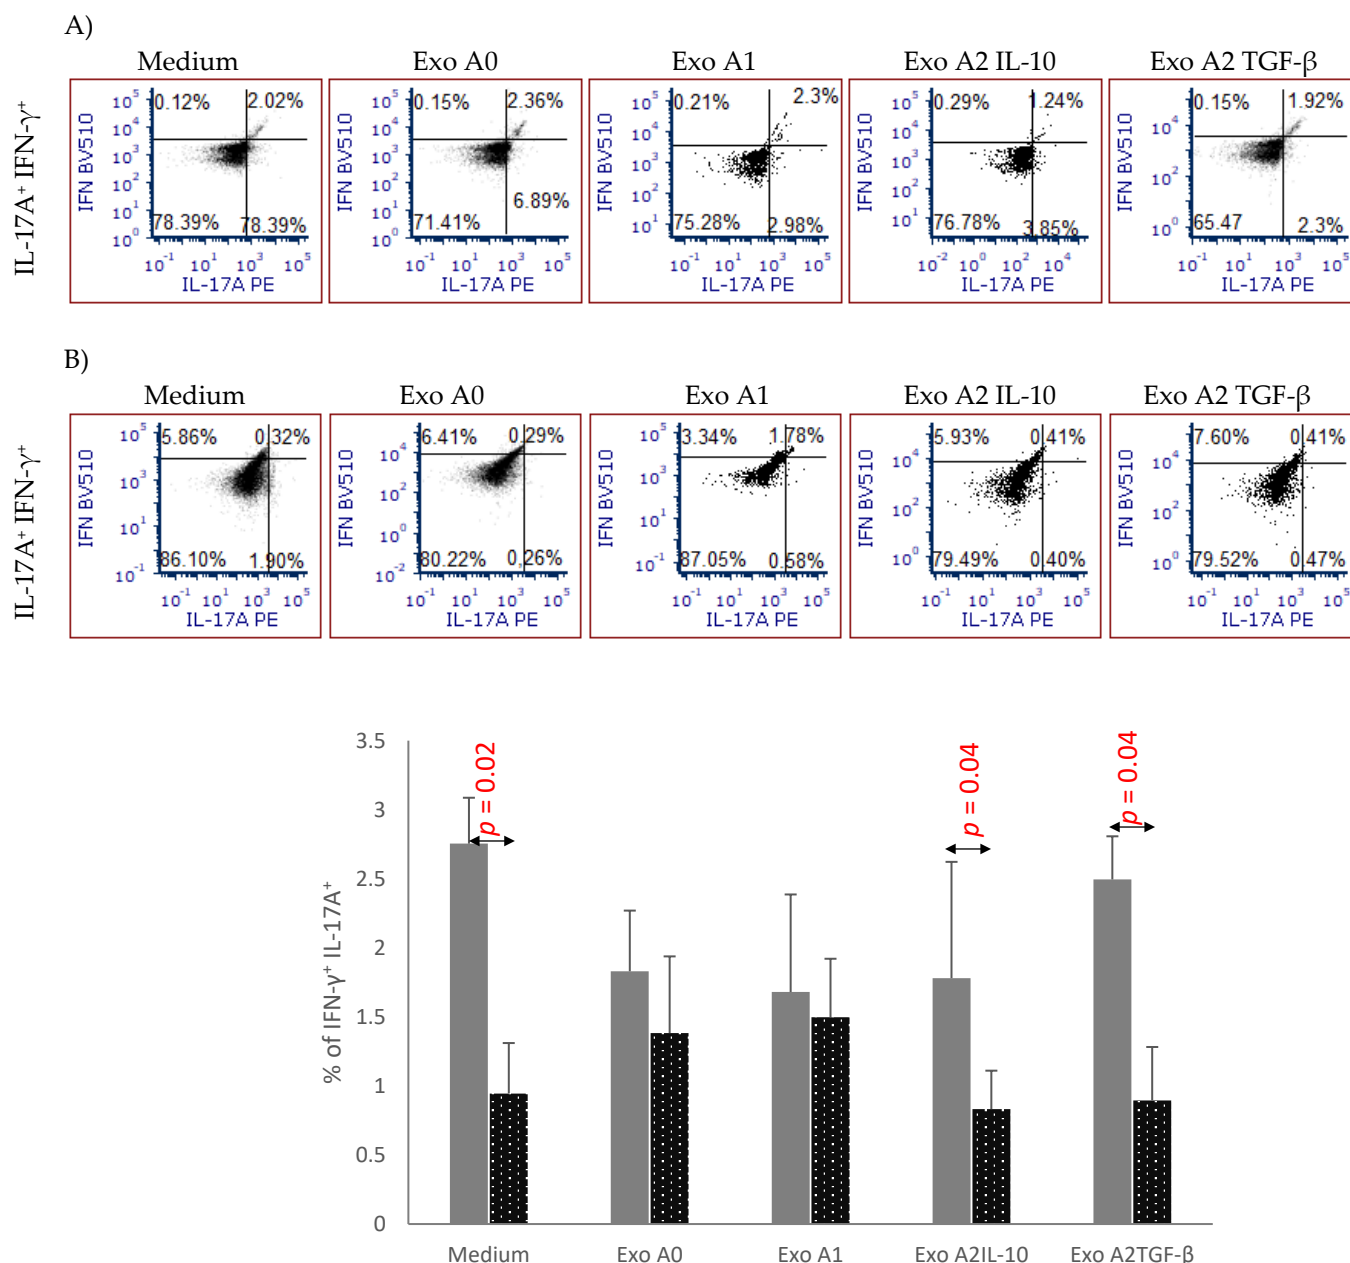

**Supplement Figure S3.** Results of flow cytometry analysis of double producers (IFN- $\gamma^+$  IL-17A $^+$ ). Percentage values of IL-17A/IFN- $\gamma$ -producing T-cells from MS-affected patients (A), and non-MS donors (B), expressed as % of CD3, CD4 - positive T lymphocytes. Mean percentage of CD3 $^+$  CD4 $^+$  cells double positive for IFN- $\gamma$  and IL-17A cytokines were compared between study groups. Data for MS patients are presented with filled bars (7 persons), results for non-MS donors are in white dotted bars (4 persons). After 96h of T-cell cultures in presence of astrocyte-derived exosomes or medium alone, culture media were collected, cells were suspended in new medium containing brefeldin A for 12h, next cells were harvested and stained for flow cytometry. Cells were analysed as a % of CD3 $^+$  CD4 $^+$  cells double positive for IFN- $\gamma$  and IL-17A. Data were shown as mean  $\pm$  SE. Comparisons between variables were made with non-parametric Wilcoxon signed-rank test, no significant differences were observed. Comparisons between groups were made with U Mann-Whitney rank-sum test.
